# Supplementary material for: Toll like receptor-based electrochemical sensors via N-heterocyclic carbene-modified surfaces: towards improved sensing of DNA molecules
Source: Royal Society of Chemistry journal article supplement (doi:10.1039/d4ma00188e), 2024-01-01
Supplement: d4ma00188e1.pdf [file d4ma00188e1.pdf]

## Supporting Information

for

### Toll Like Receptor-based Electrochemical Sensors via N-Heterocyclic Carbene-modified Surfaces: Towards Improved Sensing of DNA Molecules

Dianne S. Lee<sup>a</sup>, Mir Pouyan Zarabadi,<sup>a</sup> Hridaynath Bhattacharjee,<sup>a</sup> Lin Qi,<sup>b</sup> Jennifer F. McLeod,<sup>a</sup> Kasra Saeedfar,<sup>a</sup> Ishwar Singh,<sup>a</sup> April Woods,<sup>b</sup> Anastasia Messina,<sup>a</sup> Viola I. Birss,<sup>\*,b</sup> Cathleen M. Crudden,<sup>\*,a</sup> Zhe She<sup>\*,a</sup>

<sup>a</sup> Department of Chemistry, Queen's University, Kingston, Ontario, K7L 3N6, Canada. <sup>b</sup> Department of Chemistry, University of Calgary, Calgary, Alberta, T2N 1N4, Canada

#### Table of Content:

|                                                                              |   |
|------------------------------------------------------------------------------|---|
| Detailed Synthesis .....                                                     | 2 |
| Synthesis of NHC 2 via Staudinger Reduction. ....                            | 2 |
| Simulation Model. ....                                                       | 5 |
| 1-lipoic acid n-hydroxysuccinimide ester based TLR9 sensor performance ..... | 5 |
| Reference .....                                                              | 6 |

## Detailed Synthesis

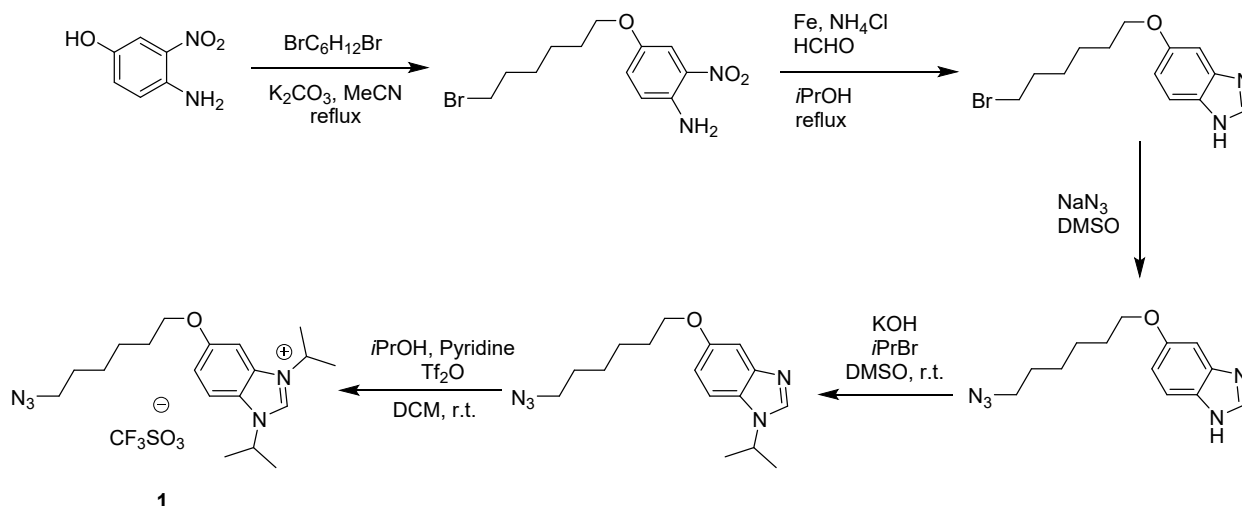

**Scheme S1.** Synthesis of Key Compound **1**.

The key compound **1** was synthesized following published procedure (Scheme 1).<sup>1</sup>

## Synthesis of NHC **2** via Staudinger Reduction.

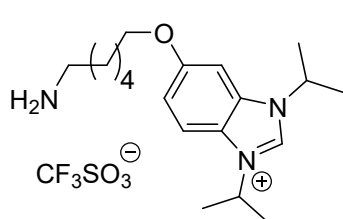

PPh<sub>3</sub> (0.276 g, 1.05 mmol) and compound **1** (0.260 g, 0.526 mmol) were dissolved in a mixture of THF/H<sub>2</sub>O (10/1, 11 mL). The resulting clear orange solution was refluxed in argon atmosphere for 20 h. After that, the reaction mixture was cooled down to r.t. and volatiles were removed under reduced pressure. A cloudy orange oil was obtained which was then dissolved in minimum volume of CH<sub>2</sub>Cl<sub>2</sub> and triturated in hexanes (3×10 mL) and Et<sub>2</sub>O (3×10 mL), consecutively. The resulting

clear red oil was dissolved again in a minimum volume of CH<sub>2</sub>Cl<sub>2</sub>, passed through a short celite plug, and concentrated to obtain **2** as a dark red sticky oil (0.187 g, 72%).

<sup>1</sup>H NMR (500 MHz, CD<sub>3</sub>CN) δ 8.83 (s, 1H, CH<sub>(aromatic)</sub>), 7.77 (d, *J* = 9.2 Hz, 1H, CH<sub>(aromatic)</sub>), 7.29 (d, *J* = 2.3 Hz, 1H, CH<sub>(aromatic)</sub>), 7.25 (dd, *J* = 9.2, 2.3 Hz, 1H, CH<sub>(aromatic)</sub>), 5.45 (s, 2H, NH<sub>2</sub>), 4.89 (hept, *J* = 6.7 Hz, 2H, (CH<sub>3</sub>)<sub>2</sub>-CH-N), 4.11 (t, *J* = 6.6 Hz, 2H, O-CH<sub>2</sub>), 2.61 (t, *J* = 6.5 Hz, 2H, H<sub>2</sub>N-CH<sub>2</sub>), 1.87 – 1.78 (m, 4H), 1.65 (d, *J* = 6.7 Hz, 12H, N-CH-(CH<sub>3</sub>)<sub>2</sub>), 1.53 – 1.45 (m, 2H), 1.42 (qd, *J* = 5.0, 2.2 Hz, 2H) ppm. <sup>13</sup>C NMR (126 MHz, CD<sub>3</sub>CN) δ 159.53, 137.23, 133.37, 126.15, 123.28, 120.73, 115.40, 97.37, 69.92, 52.26, 51.82, 41.82, 31.81, 29.48, 26.95, 26.22, 21.98, 21.93 ppm. <sup>19</sup>F NMR (471 MHz, CD<sub>3</sub>CN) δ –79.33 ppm. *m/z* calcd for C<sub>19</sub>H<sub>30</sub>ON<sub>3</sub><sup>+</sup> [M]<sup>+</sup> 318.25399, found 318.25229.

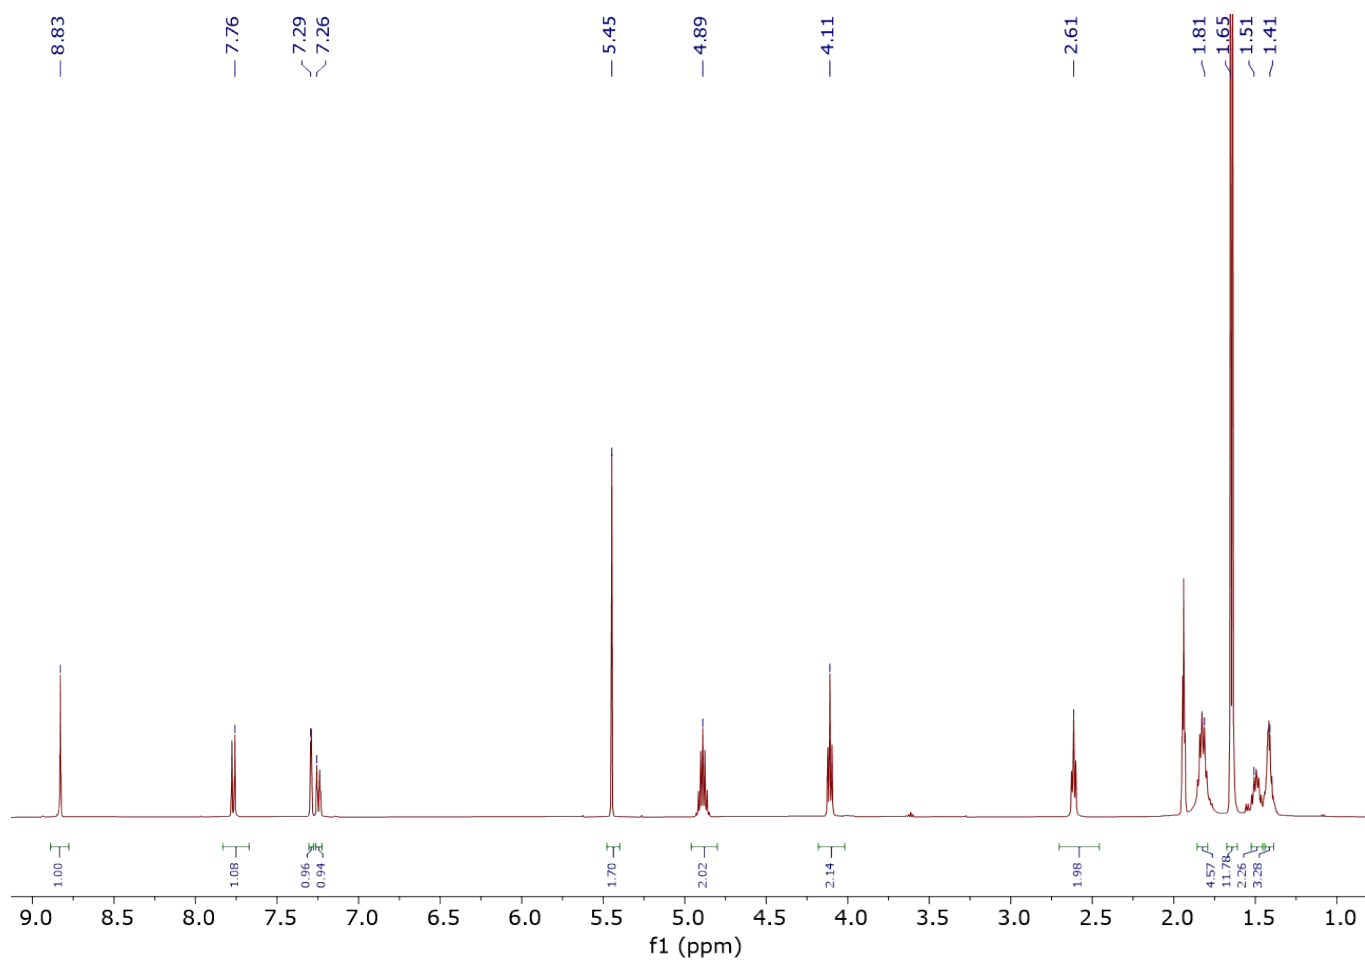

**Figure S1.** <sup>1</sup>H NMR of compound **2** in CD<sub>3</sub>CN.

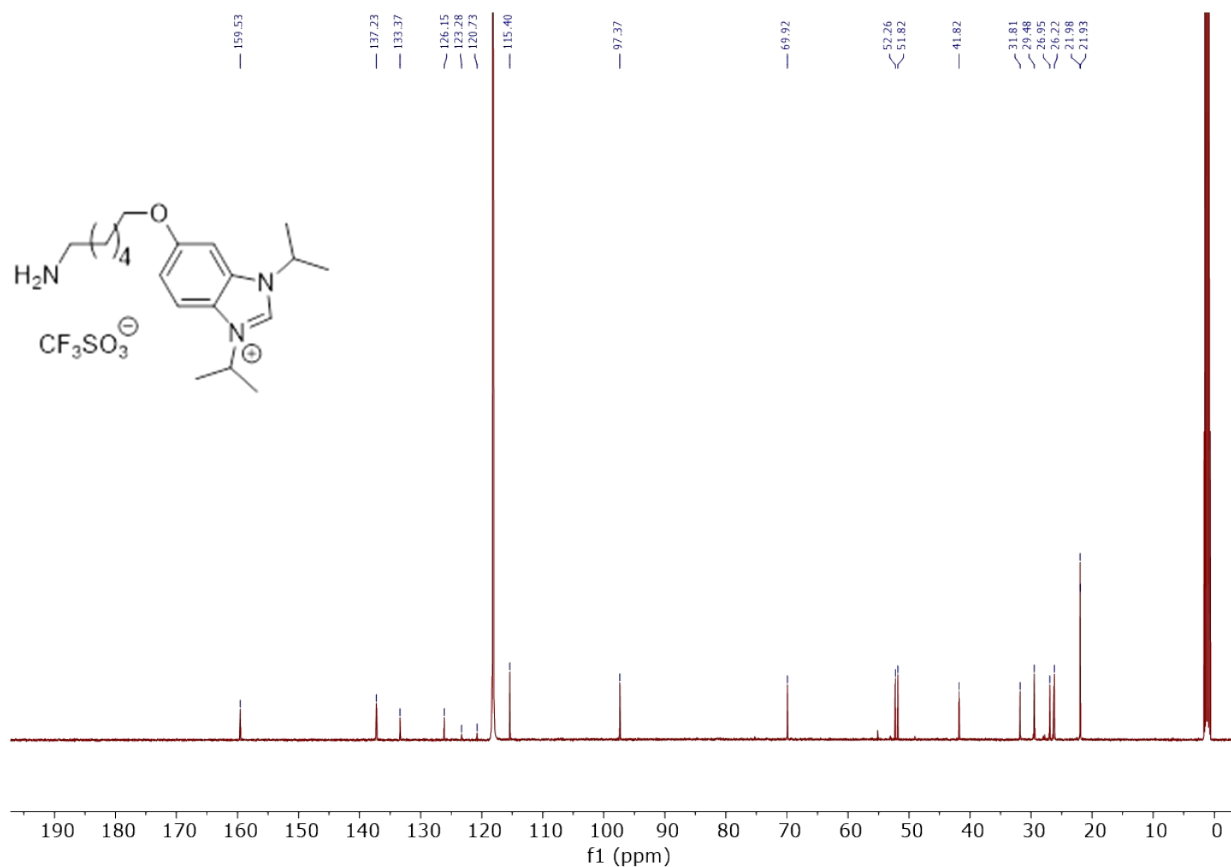

**Figure S2.**  $^{13}\text{C}\{^1\text{H}\}$  NMR of compound 2 in  $\text{CD}_3\text{CN}$ .

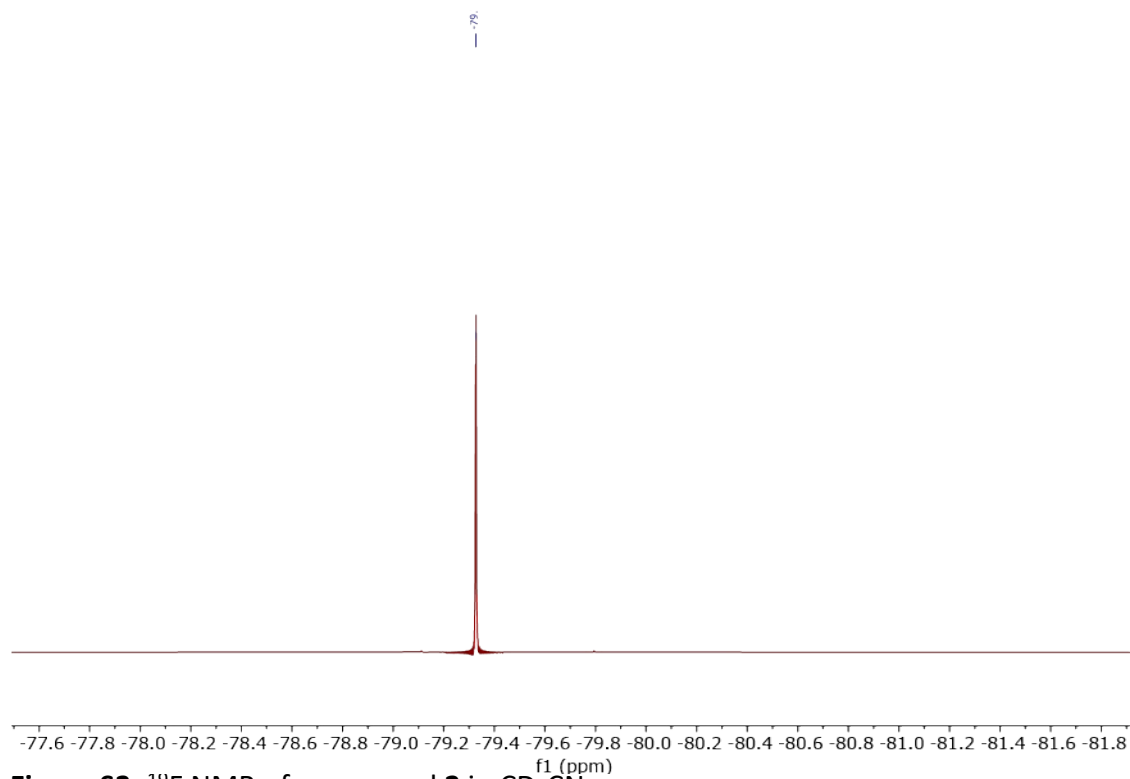

**Figure S3.**  $^{19}\text{F}$  NMR of compound 2 in  $\text{CD}_3\text{CN}$ .

## Simulation Model.

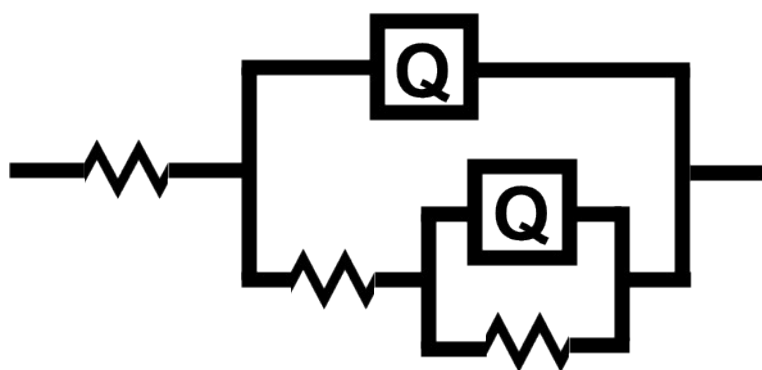

**Figure S4.** Simulator Model  $r(q(r(qr)))$  used for the fitting of impedance data to obtain Q and R values

**Table S1:** Figure 6 *p*-values between the sample and storage/contaminants.

|                                | No TLR | Pam3CSK4 | Cl307 | 4 week storage |
|--------------------------------|--------|----------|-------|----------------|
| <i>p</i> -values at 5 $\mu$ M  | 0.01   | 0.004    | 0.02  | 0.05           |
| <i>p</i> -values at 10 $\mu$ M | 0.007  | 0.008    | 0.02  | 0.08           |
| <i>p</i> -values at 20 $\mu$ M | 0.005  | 0.004    | 0.01  | 0.05           |

## lipic acid n-hydroxysuccinimide ester based TLR9 sensor performance

lipic acid n-hydroxysuccinimide ester monolayers were prepared by dissolving the said compound in 1:1 ethanol/water solution, and a clean gold substrate was immersed in this solution for 48 hours at 4 °C. The modified surface was washed with 1:1 ethanol/water solution. Then, the surface was immersed in 250  $\mu$ g/mL of TLR9 in PBS solution overnight at 4 °C, then rinsed with PBS solution. The modified substrates were then immersed in 1 M ethanolamine in 50 mM Tris(pH 8.4) for 1 hour at room temperature, then rinsed with PBS solution before the exposure to CpG.<sup>2, 3</sup>

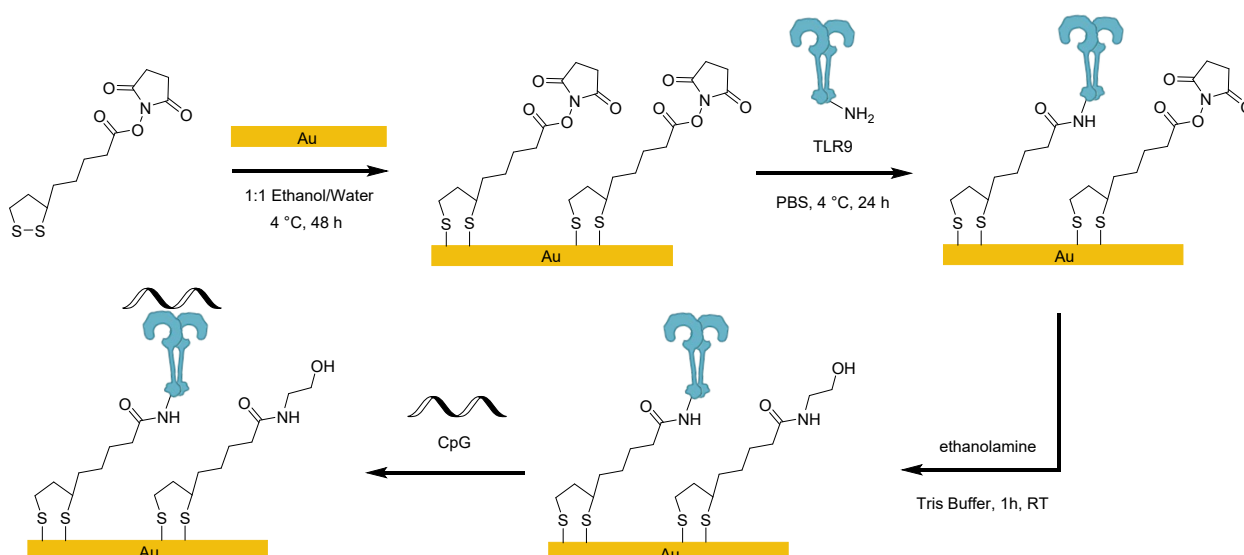

**Scheme S2:** Gold surface functionalization with 1-lipoic acid n-hydroxysuccinimide ester, followed by the immobilization of TLR9 with a primary amine side chain, the blocking stage with blocking achieved by exposure to ethanolamine, and the detection stage to various concentrations of CpG.

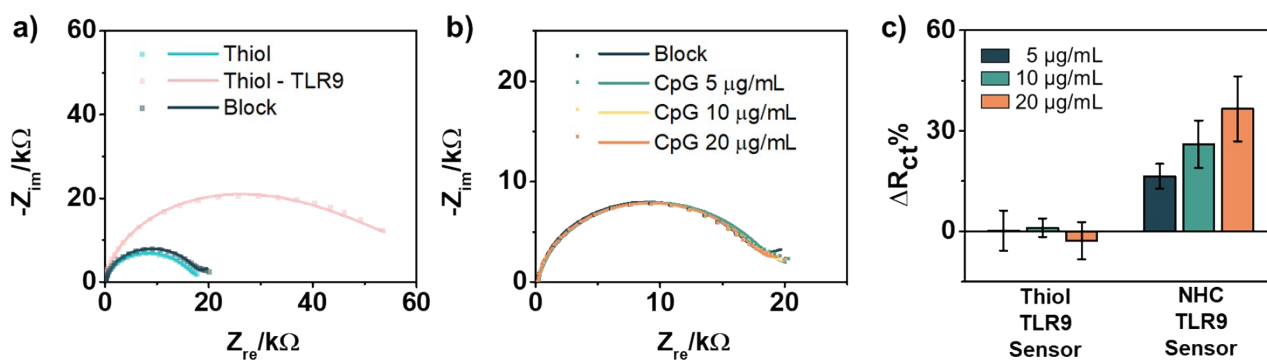

**Figure S5:** a) EIS measurements of **Thiol-TLR9** sensor construction stages. b) EIS measurements of CpG detection. c) Average  $\Delta R_{ct}\%$  values for three sensors (thiols and NHC based) to different concentrations of CpG. The error bars represent the standard deviation based on the three electrode replicates for the average.

## Reference

1. Singh, I.; Lee, D. S.; Huang, S.; Bhattacharjee, H.; Xu, W.; McLeod, J. F.; Crudden, C. M.; She, Z., N-Heterocyclic Carbenes Meet Toll-like Receptors. *Chemical Communications* **2021**, 57, 8421.
2. McLeod, J.; Park, C.; Cunningham, A.; O'Donnell, L.; Brown, R. S.; Kelly, F.; She, Z., Developing a toll-like receptor biosensor for Gram-positive bacterial detection and its storage strategies. *Analyst* **2020**, 145 (18), 6024-6031.
3. She, Z.; Topping, K.; Ma, T.; Zhao, T.; Zhou, W.; Kamal, A.; Ahmadi, S.; Kraatz, H.-B., Detection of the Lipopeptide Pam3CSK4 Using a Hybridized Toll-like Receptor Electrochemical Sensor. *Analytical Chemistry* **2017**, 89 (9), 4882-4888.
